# Supplementary material for: Recognition of the CCT5 di‐Glu degron by CRL4DCAF12 is dependent on TRiC assembly
Source: PubMed Central journal article supplement — EMBO J. 2023 Jan 30;42(4):e112253. doi: 10.15252/embj.2022112253 (PMC9929631; doi:10.15252/embj.2022112253), 2023-01-30
Supplement: EMBJ-42-e112253-s002.pdf [file EMBJ-42-e112253-s002.pdf]

## Expanded View Figures

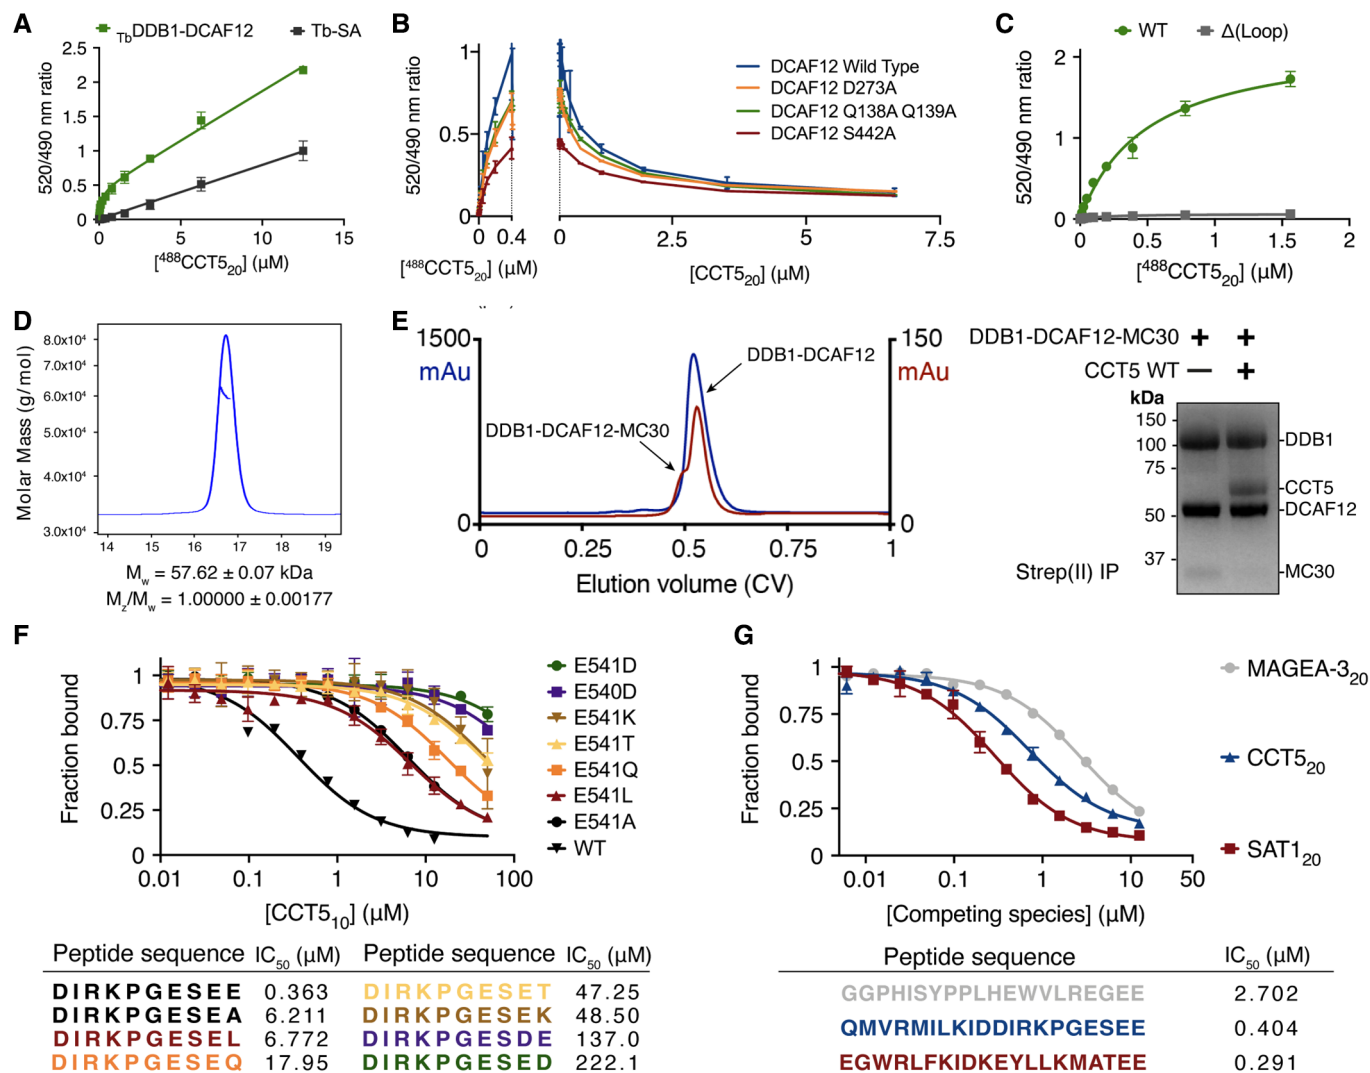

**Figure EV1. DCAF12 binds monomeric substrates.**

- A Titration curves between a fluorescent <sup>488</sup>CCT5<sub>20</sub> degnon peptide and 50 nM biotinylated DDB1-DCAF12 pre-mixed with 2 nM terbium-coupled streptavidin (TbDDB1-DCAF12) or 2 nM terbium-coupled streptavidin (Tb-SA) (*n* = 3). Signal originating in the absence of TbDDB1-DCAF12 is unspecific and becomes dominant at high <sup>488</sup>CCT5<sub>20</sub> concentrations.
- B Left: titrations between 0–0.4 μM <sup>488</sup>CCT5<sub>20</sub> and mutant TbDDB1-DCAF12 complexes (*n* = 3). The maximum fluorescent signal originating from the titrations was out-competed with a label-free CCT5<sub>20</sub> peptide (right).
- C Titration curves between <sup>488</sup>CCT5<sub>20</sub> and wild-type (WT) TbDDB1-DCAF12 or a mutant with DCAF12 amino acids 370–416 replaced by a flexible glycine-serine linker (Δ(Loop)) (*n* = 3).
- D SEC-MALS analysis of wild-type CCT5. The chromatogram displays Rayleigh ratio curves for CCT5 together with the molar mass in Da of the main peaks. The calculated molecular weight (*M<sub>w</sub>*) corresponds to a CCT5 monomer. The polydispersity of the sample (*M<sub>z</sub>*/*M<sub>w</sub>*) indicates a uniform species in the peak.
- E Left: a representative size exclusion chromatograph (blue) for DDB1-DCAF12. A fraction of DDB1-DCAF12 is bound to a contaminant of ~30 kDa in size, MC30, that ends in a Glu-Thr motif. The contribution of the DDB1-DCAF12-MC30 species to the chromatograph absorbance (measured in arbitrary absorbance units, mAu) increases in low-yield purifications (red). Right: untagged CCT5 displaces MC30 from his<sub>6</sub>-DDB1-strep(II)-DCAF12 *in vitro*.
- F TR-FRET counter-titrations of label-free CCT5<sub>20</sub> degnon peptides with mutant C-terminal amino acids (*n* = 3).
- G TR-FRET counter-titrations of label-free degnon peptides of different DCAF12 substrates (Koren et al. 2018) into TbDDB1-DCAF12<sup>488</sup> (*n* = 3).

Data information: In (A, B, C, F, G), data are presented as mean ± 95% CI. Where indicated, “*n*” represents biological replicates.

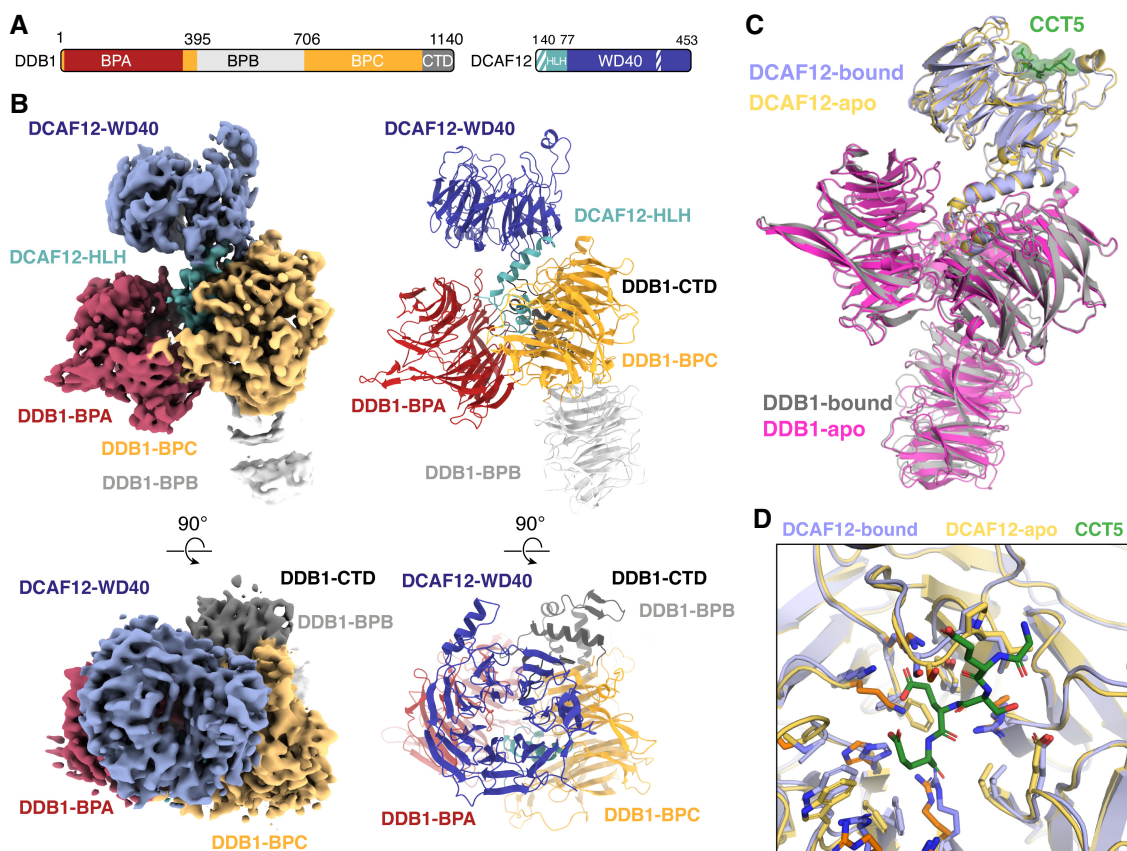

**Figure EV2. Cryo-EM structure of DDB1-DCAF12 in the absence of CCT5.**

- A Domain organization of the proteins present in the sample. Unmodeled regions are shown as stripes.
- B Different views of the DDB1-DCAF12 cryo-EM map (left) with fit structures (right). The map and models are colored as in (A).
- C Superposition of the DDB1-DCAF12 (apo) and DDB1-DCAF12-CCT5 (bound) structures. Density corresponding to the CCT5 peptide (shown as green sticks with surface representation) was only observed in the DDB1-DCAF12-CCT5 structure (Fig 2). The root-mean-square deviation (RMSD) between the two structures is 1.2 Å between all atoms and 1.0 Å when excluding the flexible BPB domain of DDB1.
- D Superposition of the residues forming the DCAF12 pocket between the DDB1-DCAF12 (apo) and DDB1-DCAF12-CCT5 (bound) cryo-EM structures.

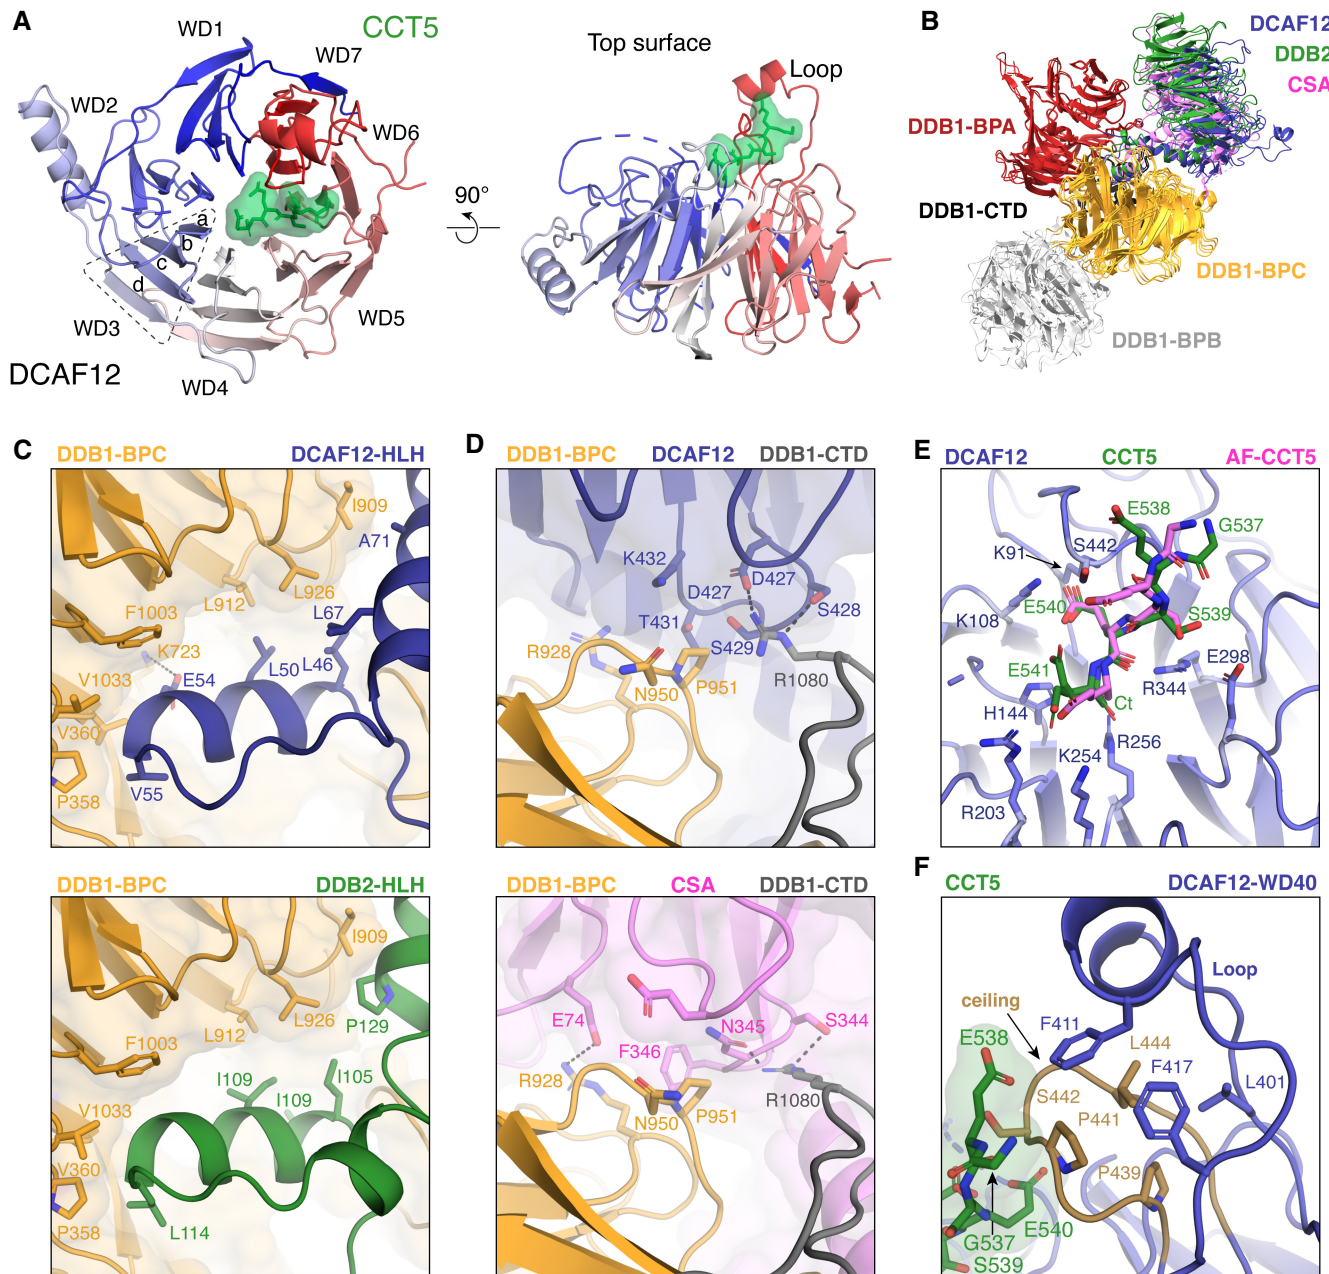

**Figure EV3. DCAF12 assembles into a CRL4 ligase.**

- A** Structural organization of the DCAF12 WD40 domain. The blades of the DCAF12  $\beta$ -propeller are labeled WD1–WD7 and colored according to their proximity to the N- or C-terminus. Each blade is composed of four  $\beta$  strands labeled a–d in the outward direction. The CCT5 degron peptide is shown as green sticks and surface representation.
- B** Superposition between the coordinates of DDB1–DCAF12 (this study), DDB1–DDB2 (PDB ID 4A0K; Fischer *et al*, 2011) and DDB1–CSA (PDB ID 4A11; Fischer *et al*, 2011).
- C, D** Close-up of DDB1 residues contacted by the HLH motif (C) or  $\beta$ -propeller (D) of DCAF12 (top) that are involved in binding other substrate receptors (bottom).
- E** Superposition of the AlphaFold2 prediction for the CCT5 peptide (AF-CCT5, violet) onto the cryo-EM coordinates of DDB1–DCAF12–CCT5 (CCT5 shown in green). The two modeled conformations of the CCT5 Glu541 side chain are depicted.
- F** Close-up of the hydrophobic residues mediating the interaction between the DCAF12 Loop (amino acids 370–416) and ceiling (amino acids 438–447).

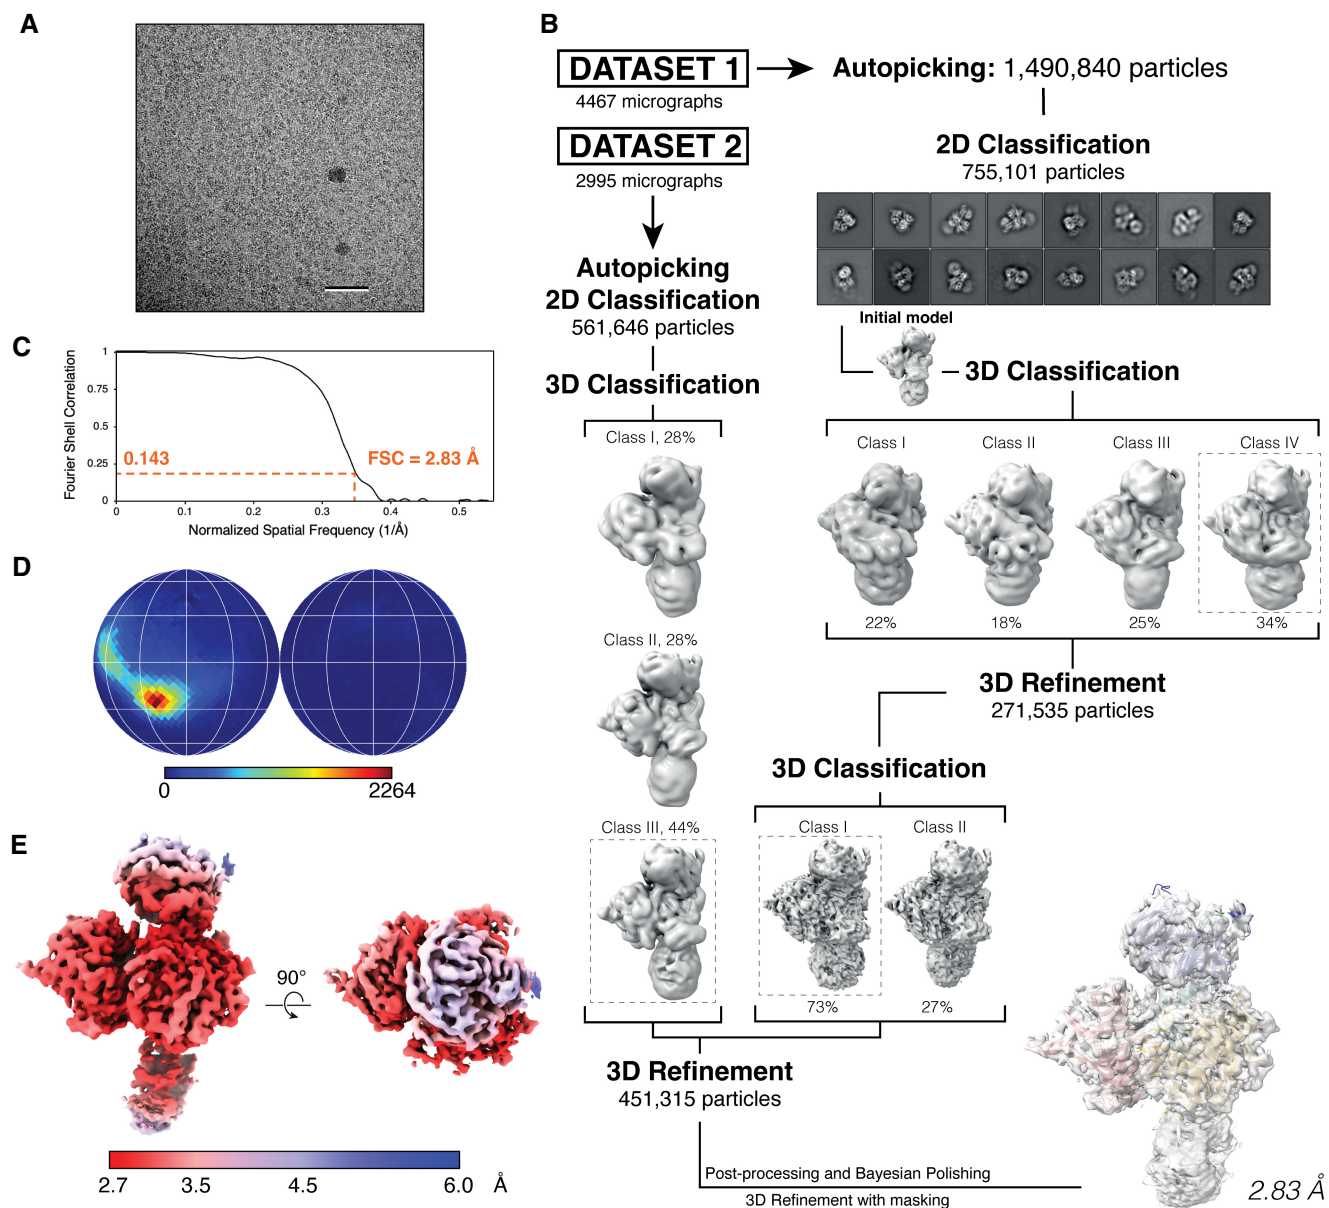

**Figure EV4. DDB1-DCAF12-CCT5 cryo-EM structure determination.**

- A Representative micrograph from the DDB1-DCAF12-CCT5 collection. Scale bar: 50 nm.
- B Workflow of cryo-EM data analysis for the DDB1-DCAF12-CCT5 cryo-EM map.
- C Gold standard Fourier shell correlation (FSC) curve for the DDB1-DCAF12-CCT5 reconstruction.
- D Angular distribution of DDB1-DCAF12-CCT5.
- E Final cryo-EM map colored according to its local resolution, in angstroms.

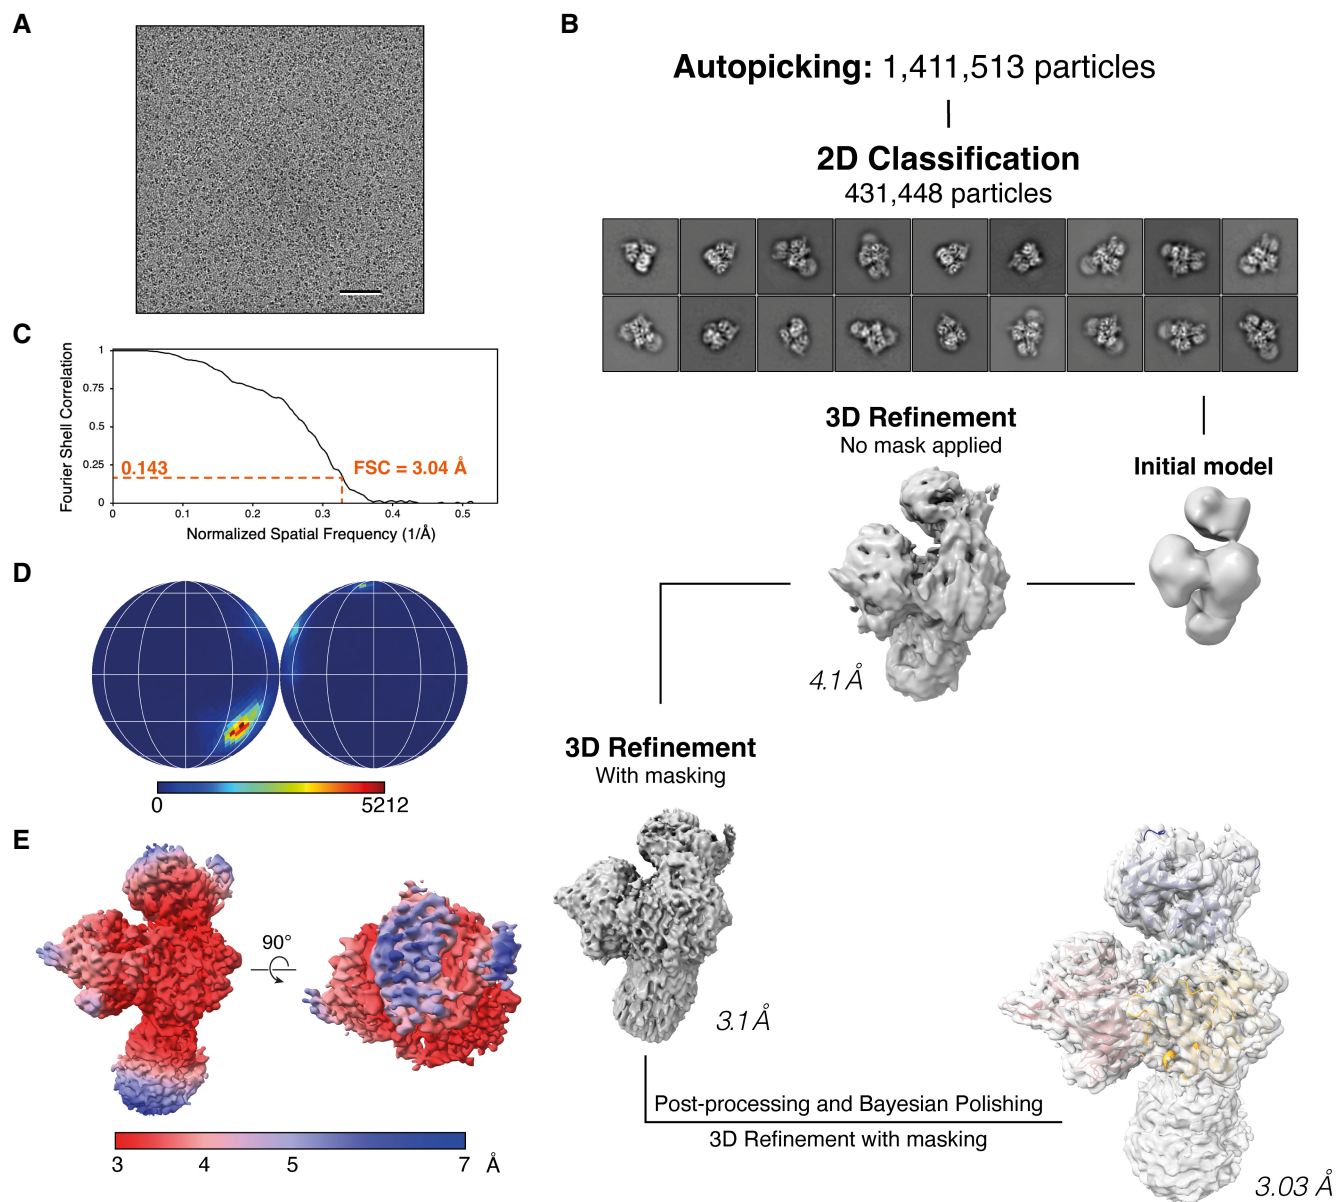

**Figure EV5. DDB1-DCAF12 cryo-EM structure determination.**

- A Representative micrograph from the DDB1-DCAF12 collection. Scale bar: 50 nm.
- B Workflow of cryo-EM data analysis for the DDB1-DCAF12 cryo-EM map. 4,568 micrographs were collected.
- C Gold standard Fourier shell correlation (FSC) curve for the DDB1-DCAF12 reconstruction.
- D Angular distribution of DDB1-DCAF12.
- E Final cryo-EM map colored according to its local resolution, in angstroms.
